# Supplementary material for: Spike-Timing-Based Computation in Sound Localization
Source: PLOS journal article supplement (doi:10.1371/journal.pcbi.1000993), 2010-11-11
Supplement: S4 (10.1371/journal.pcbi.1000993.s004) [file journal.pcbi.1000993.s004]

## Spike-timing-based computation in sound localization

Dan F. M. Goodman<sup>1,2</sup> and Romain Brette<sup>1,2,\*</sup>

1, Laboratoire Psychologie de la Perception, CNRS and Université Paris Descartes, Paris, France

2, Département d'Etudes Cognitives, Ecole Normale Supérieure, Paris, France

\* Email : romain.brette@ens.fr

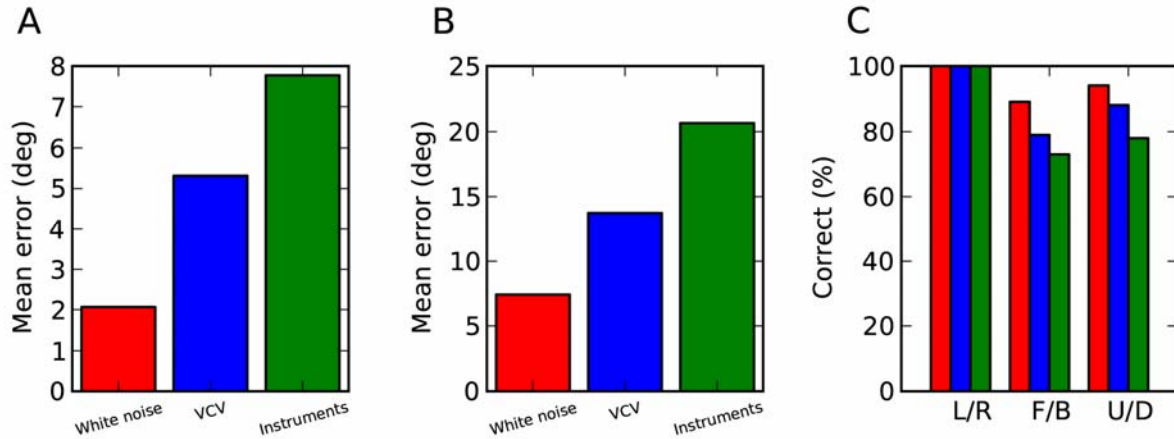

Figure S4. Performance of approximate model when delays are constrained in the  $\pi$ -limit: in each band with central frequency  $f$ , all delays are replaced by delays between  $-1/(2f)$  and  $1/(2f)$  with the same phases. Colors and lines follow the same conventions as in Figure 6. (A) Error in azimuth. (B) Error in elevation. (C) Categorization performance (as in Figure 6).
